# Supplementary material for: Annona muricata Leaves as a Source of Bioactive Compounds: Extraction and Quantification Using Ultrasound
Source: MDPI journal article supplement (doi:10.3390/horticulturae8070560), 2022-06-21
Supplement: s1 [file horticulturae-1751731-supplementary.pdf › horticulturae-1751731-supplementary.pdf]

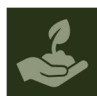**Table S1.** Analysis of variance and regression coefficients of quadratic polynomial models with ultrasonic-assisted extraction on total soluble phenols and yield from extracts of *Annona muricata* leaves.

| Source                                         | Analysis of Variance |    |         |         | Regression Coefficients |
|------------------------------------------------|----------------------|----|---------|---------|-------------------------|
|                                                | SS                   | DF | MS      | F Value |                         |
| Total soluble phenols                          |                      |    |         |         | B-coefficient           |
| Mean/Intercept                                 | -                    | -  | -       | -       | 440.39 *                |
| X <sub>SA</sub>                                | 344.11               | 1  | 344.11  | 8.50 *  | -8.11 *                 |
| X <sub>SA</sub> <sup>2</sup>                   | 369.99               | 1  | 369.99  | 9.14 *  | 0.03 **                 |
| X <sub>PC</sub>                                | 863.35               | 1  | 863.35  | 21.33 * | -899.07 *               |
| X <sub>PC</sub> <sup>2</sup>                   | 2416.38              | 1  | 2416.38 | 59.69 * | 434.81 *                |
| X <sub>ET</sub>                                | 446.56               | 1  | 446.56  | 11.03 * | 20.68 *                 |
| X <sub>ET</sub> <sup>2</sup>                   | 2836.47              | 1  | 2836.47 | 70.07 * | -4.00 *                 |
| X <sub>SA</sub> × X <sub>PC</sub>              | 199.12               | 1  | 199.12  | 4.92 *  | 21.53 *                 |
| X <sub>SA</sub> × X <sub>PC</sub> <sup>2</sup> | 1937.01              | 1  | 1937.01 | 47.85 * | -9.98 *                 |
| X <sub>SA</sub> <sup>2</sup> × X <sub>PC</sub> | 283.65               | 1  | 283.65  | 7.01 *  | -0.06 *                 |
| X <sub>SA</sub> × X <sub>ET</sub>              | 3254.52              | 1  | 3254.52 | 6.29 *  | 0.12 *                  |
| X <sub>PC</sub> × X <sub>ET</sub>              | 380.40               |    | 380.40  | 9.40 *  | 9.38 *                  |
| Lack of Fit                                    | 34.56                | 1  | 34.56   | 0.85 ** |                         |
| Pure Error                                     | 1295.39              | 32 | 40.48   |         |                         |
| R-square                                       | 0.886                |    |         |         |                         |
| R-Adjust                                       | 0.848                |    |         |         |                         |
| Total SS                                       | 11668.15             | 44 |         |         |                         |
| Yield                                          |                      |    |         |         | β-coefficient           |
| Mean/Intercept                                 | -                    | -  | -       | -       | 12.56 *                 |
| X <sub>SA</sub>                                | 0.09                 | 1  | 0.09    | 2.34 ** | -0.18 *                 |
| X <sub>SA</sub> <sup>2</sup>                   | 0.32                 | 1  | 0.32    | 8.14 *  | 1.44 <sup>-4</sup> **   |
| X <sub>PC</sub>                                | 0.58                 | 1  | 0.58    | 14.91 * | -28.38 *                |
| X <sub>PC</sub> <sup>2</sup>                   | 2.13                 | 1  | 2.13    | 54.70 * | 13.84 *                 |
| X <sub>ET</sub>                                | 0.43                 | 1  | 0.43    | 11.03 * | 1.06 *                  |
| X <sub>ET</sub> <sup>2</sup>                   | 2.12                 | 1  | 2.12    | 54.46 * | -0.11 *                 |
| X <sub>SA</sub> × X <sub>PC</sub>              | 0.32                 | 1  | 0.32    | 8.13 *  | 0.67 *                  |
| X <sub>SA</sub> × X <sub>PC</sub> <sup>2</sup> | 1.89                 | 1  | 1.89    | 48.52 * | -0.31 *                 |
| X <sub>SA</sub> <sup>2</sup> × X <sub>PC</sub> | 0.26                 | 1  | 0.26    | 6.65 *  | -1.73 <sup>-3</sup> *   |
| X <sub>SA</sub> × X <sub>ET</sub>              | 0.31                 | 1  | 0.31    | 8.06 *  | -0.02 **                |
| X <sub>SA</sub> <sup>2</sup> × X <sub>ET</sub> | 0.10                 | 1  | 0.10    | 2.56 ** | 1.61 <sup>-4</sup> **   |
| X <sub>PC</sub> × X <sub>ET</sub>              | 0.30                 | 1  | 0.30    | 7.80 *  | 0.27 *                  |
| Pure Error                                     | 1.25                 | 32 | 0.04    |         |                         |
| R-square                                       | 0.873                |    |         |         |                         |
| R-Adjust                                       | 0.826                |    |         |         |                         |
| Total SS                                       | 9.86                 | 44 |         |         |                         |

X<sub>SA</sub> = Sonication amplitude; X<sub>PC</sub> = Pulse cycle (s); X<sub>ET</sub> = Extraction time; SS = Sum of square; DF = Degree of freedom; MS = Means square. \* Significant ( $p < 0.05$ ); \*\* nonsignificant ( $p > 0.05$ ).

**Table S2.** The predicted mathematical models for the extraction of soluble polyphenols (mg/100 mL) and yield from extracts of *Annona muricata* leaves after ultrasound-assisted extraction.

| Response                          | Proposed Model                                                                                                                                                                                                                               | Equation |
|-----------------------------------|----------------------------------------------------------------------------------------------------------------------------------------------------------------------------------------------------------------------------------------------|----------|
| Total soluble phenols (mg/100 mL) | $440.39 - 8.11X_{SA} + 0.03X_{SA}^2 - 899.07X_{PC} + 434.81X_{PC}^2 + 20.68X_{ET} - 4.0X_{ET}^2 + 21.53X_{SA} \times X_{PC} - 9.98X_{SA} \times X_{PC}^2 - 0.06X_{SA}^2 \times X_{PC} + 0.12X_{SA} \times X_{ET} + 9.38X_{PC} \times X_{ET}$ | (4)      |

---

|           |                                                                                                                                                                                                                                                                                                                                      |     |
|-----------|--------------------------------------------------------------------------------------------------------------------------------------------------------------------------------------------------------------------------------------------------------------------------------------------------------------------------------------|-----|
| Yield (%) | $  \begin{aligned}  &12.56 - 0.18X_{SA} + 1.44^{-4}X_{SA}^2 - 28.38X_{PC} + 13.84X_{PC}^2 + 1.06X_{ET} - 0.11X_{ET}^2 \\  &+ 0.67X_{SA} \times X_{PC} - 0.31 X_{SA} \times X_{PC}^2 - 1.73^{-3}X_{SA}^2 \times X_{PC} \\  &- 0.02X_{SA} \times X_{ET} + 1.61^{-4}X_{SA}^2 \times X_{ET} + 0.27X_{PC} \times X_{ET}  \end{aligned}  $ | (5) |
|-----------|--------------------------------------------------------------------------------------------------------------------------------------------------------------------------------------------------------------------------------------------------------------------------------------------------------------------------------------|-----|

---

$X_{SA}$  = Sonication amplitude;  $X_{PC}$  = Pulse cycle (s);  $X_{ET}$  = Extraction time.
